# Supplementary material
Source: PubMed Central journal article supplement (PMC3208160)
Supplement: 11-7973_z7g999112116sf01.pdf [file 11-7973_z7g999112116sf01.pdf]

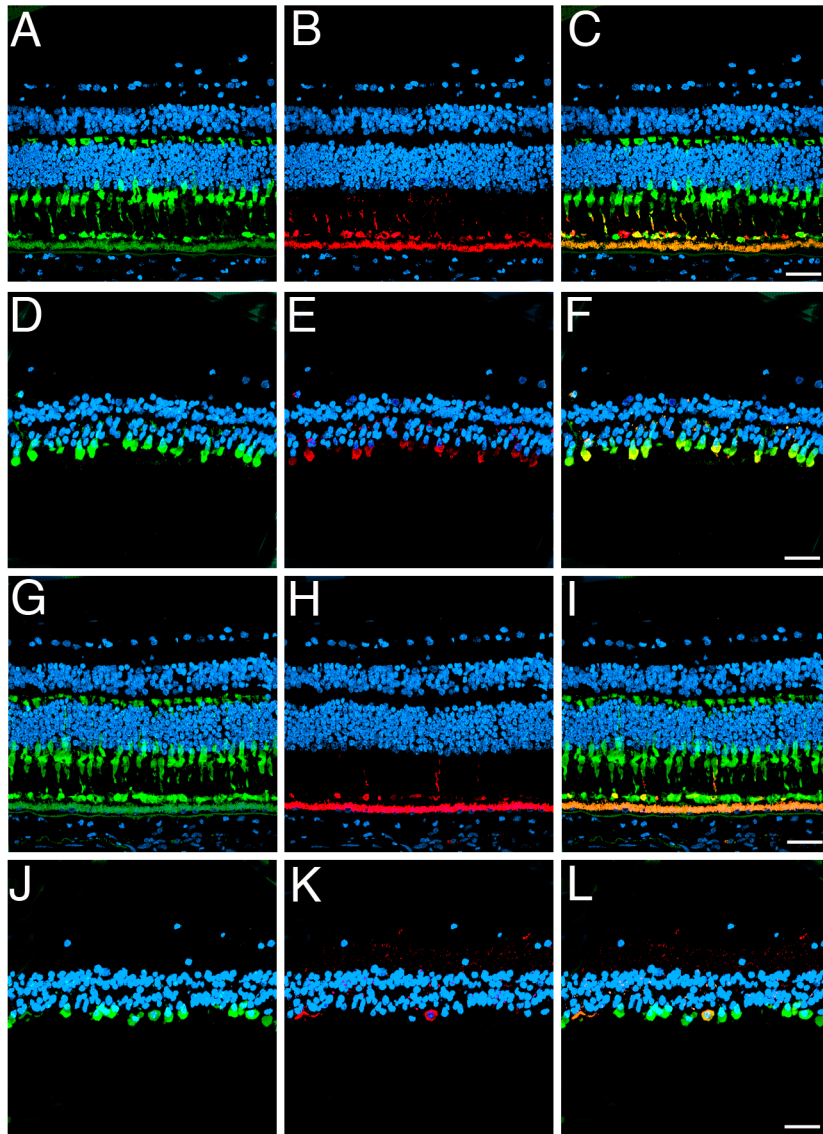

**Suppl. Fig. 1. Decreased expression of red/green and blue opsins in the cones in the periphery of an RPE65 postmortem donor eye.** The distribution of cones was also analyzed in control and RPE65 eyes labeled with the cone arrestin (7G6), red/green (AB5405) and blue opsin (AB5407) antibodies. Control retinas displayed cone arrestin distributed along the entire cone cell body (A, G), however the RPE65 donor retina displayed degenerated stubby cones with no distinct outer segments (D, J). In the control eyes red/green (B) and blue opsins (H) were restricted to the cone outer segments. In the

RPE65 eyes the red/green opsin displayed a more diffuse staining (E) that overlapped with cone arrestin. However, blue opsin localization was mostly to the cone cell boundaries (K, arrows). Overlaid images are shown in C, F, I, L. Bar = 40 $\mu$ m.
